# Supplementary material
Source: publisher site journal article supplement (https://www.dovepress.com/article/291774)
Supplement: Supplementary file 1 [file get_supplementary_file.php]

**Supplementary Appendix**

**Supplementary Tables**

**Supplementary Table 1** Description of patient demographics, history of exacerbation(s), NHBLI Step, comorbid conditions, and treatments ascertained at index or during the 12-month baseline period among patients with ≥1 exacerbation during the follow-up period

|  | **Overall** | **NHLBI Step** | | | | | | |
| --- | --- | --- | --- | --- | --- | --- | --- | --- |
| **Step 1** | **Step 2** | **Step 3** | **Step 4** | **Step 5** | **Step 6** | **None** |
| **Overall N, (%)** | 10,590 (100) | 2163 (20.42) | 1931 (18.23) | 1280 (12.09) | 3121 (29.47) | 1641 (15.50) | 66 (0.62) | 388 (3.66) |
| **Age, years, mean (SD)** | 48.99 (15.41) | 44.41 (15.60) | 48.55 (15.40) | 49.10 (16.17) | 50.80 (15.14) | 50.82 (13.84) | 51.80 (12.06) | 53.62 (15.12) |
| **Age group, years, n, (%)** |  |  |  |  |  |  |  |  |
| 18 to 34 | 1963 (18.5) | 617 (28.5) | 367 (19.0) | 260 (20.3) | 464 (14.9) | 203 (12.4) | 6 (9.1) | 46 (11.9) |
| 35 to 44 | 2177 (20.6) | 518 (24.0) | 405 (21.0) | 247 (19.3) | 596 (19.1) | 338 (20.6) | 12 (18.2) | 61 (15.7) |
| 45 to 54 | 2453 (23.2) | 469 (21.7) | 449 (23.3) | 279 (21.8) | 730 (23.4) | 417 (25.4) | 20 (30.3) | 89 (22.9) |
| 55 to 64 | 2180 (20.6) | 301 (13.9) | 390 (20.2) | 251 (19.6) | 710 (22.8) | 409 (24.9) | 19 (28.8) | 100 (25.8) |
| 65+ | 1817 (17.2) | 258 (11.9) | 320 (16.6) | 243 (19.0) | 621 (19.9) | 274 (16.7) | 9 (13.6) | 92 (23.7) |
| **Gender, n, (%)** |  |  |  |  |  |  |  |  |
| Males | 3262 (30.8) | 730 (33.8) | 468 (24.2) | 415 (32.4) | 989 (31.7) | 541 (33.0) | 26 (39.39) | 93 (23.97) |
| Females | 7326 (69.19) | 1431 (66.2) | 1463 (75.8) | 865 (67.6) | 2132 (68.3) | 1100 (67.0) | 40 (60.6) | 295 (76.0) |
| **Geographic Region, n, (%)** |  |  |  |  |  |  |  |  |
| Northeast | 1214 (11.5) | 244 (11.3) | 205 (10.6) | 150 (11.7) | 376 (12.1) | 180 (11.0) | 9 (13.9) | 50 (12.9) |
| Midwest | 3374 (31.9) | 665 (30.8) | 623 (32.3) | 455 (35.6) | 960 (30.8) | 544 (33.2) | 16 (24.6) | 111 (28.6) |
| South | 3595 (34.0) | 755 (35.0) | 733 (38.0) | 350 (27.4) | 1078 (34.6) | 527 (32.2) | 27 (41.5) | 125 (32.2) |
| West | 2395 (22.6) | 495 (22.9) | 369 (19.1) | 324 (25.3) | 704 (22.6) | 388 (23.7) | 13 (20.0) | 102 (26.3) |
| **Comorbidities (10 most frequent), n, (%)** |  |  |  |  |  |  |  |  |
| Symptoms involving respiratory system and other chest symptoms | 5221 (49.3) | 1111 (51.4) | 908 (47.0) | 555 (43.4) | 1533 (49.1) | 834 (50.8) | 44 (66.7) | 236 (60.8) |
| Essential hypertension | 3899 (36.8) | 691 (32.0) | 745 (38.6) | 458 (35.8) | 1173 (37.6) | 618 (37.7) | 27 (40.9) | 187 (48.2) |
| Disorders of lipoid metabolism | 3709 (35.0) | 592 (27.4) | 731 (37.9) | 437 (34.1) | 1156 (37.0) | 606 (37.0) | 24 (36.4) | 163 (42.0) |
| Other and unspecified disorders of joint | 2885 (27.2) | 549 (25.4) | 567 (29.4) | 343 (26.8) | 818 (26.2) | 451 (27.5) | 18 (27.3) | 139 (35.8) |
| Acute sinusitis | 2699 (25.5) | 530 (24.5) | 523 (27.1) | 264 (20.6) | 824 (26.4) | 447 (27.2) | 17 (25.8) | 94 (24.2) |
| Other disorders of soft tissues | 2587 (24.4) | 494 (22.8) | 482 (25.0) | 279 (21.8) | 745 (23.9) | 417 (25.4) | 19 (28.8) | 151 (38.9) |
| Other and unspecified disorders of back | 2471 (23.3) | 512 (23.7) | 473 (24.5) | 251 (19.6) | 673 (21.6) | 428 (26.1) | 12 (18.2) | 122 (31.4) |
| Diseases of esophagus | 2427 (22.9) | 357 (16.5) | 471 (24.4) | 249 (19.5) | 745 (23.9) | 433 (26.4) | 22 (33.3) | 150 (38.7) |
| Acute bronchitis and bronchiolitis | 2396 (22.6) | 549 (25.4) | 429 (22.2) | 252 (19.7) | 702 (22.5) | 362 (22.1) | 19 (28.8) | 83 (21.4) |
| Acute upper respiratory infections of multiple or unspecified sites | 1965 (18.6) | 458 (21.2) | 379 (19.6) | 199 (15.6) | 562 (18.0) | 276 (16.8) | 15 (22.7) | 76 (19.6) |
| **Allergic Rhinitis/Atopy** | 4913 (46.4) | 696 (32.2) | 1011 (52.4) | 531 (41.5) | 1565 (50.1) | 894 (54.5) | 46 (69.7) | 170 (43.8) |
| **History of asthma exacerbation** |  |  |  |  |  |  |  |  |
| **Mean exacerbations, (SD)** | 0.67 (1.01) | 0.66 (0.96) | 0.55 (0.86) | 0.53 (0.82) | 0.66 (0.98) | 0.90 (1.21) | 1.36 (1.68) | 0.88 (1.31) |
| **Median** | 0 | 0 | 0 | 0 | 0 | 1 | 1 | 0 |
| **Proportion with exacerbations, n, (%)** | 4604 (43.5) | 945 (43.7) | 727 (37.7) | 483 (37.7) | 1342 (43.0) | 879 (53.6) | 40 (60.6) | 188 (48.5) |
| <2 | 9025 (85.2) | 1860 (86.0) | 1711 (88.6) | 1139 (89.0) | 2672 (85.6) | 1289 (78.6) | 44 (66.7) | 310 (79.9) |
| >2 | 1565 (14.8) | 303 (14.0) | 220 (11.4) | 141 (11.0) | 449 (14.4) | 352 (21.5) | 22 (33.3) | 78 (20.1) |
|  |  |  |  |  |  |  |  |  |
| **Exacerbation type, n, (%)** |  |  |  |  |  |  |  |  |
| OCS-defined (≥1) | 4068 (38.4) | 766 (35.4) | 640 (33.1) | 436 (34.1) | 1197 (38.4) | 820 (50.0) | 36 (54.6) | 173 (44.6) |
| Asthma-related ED/hospital admission (≥1) | 855 (8.1) | 247 (11.4) | 119 (6.2) | 75 (5.9) | 241 (7.7) | 126 (7.7) | 12 (18.2) | 35 (9.0) |
| **Asthma medication (non-mutually exclusive), n, %** |  |  |  |  |  |  |  |  |
| SABA |  |  |  |  |  |  |  |  |
| Count of SABA canisters, mean, SD | 3.47 (4.0) | 5.12 (4.4) | 2.59 (3.6) | 2.87 (3.4) | 3.06 (3.7) | 3.53 (4.1) | 5.08 (4.8) | 3.45 (4.0) |
| 4+ | 3452 (32.6) | 1083 (50.1) | 427 (22.1) | 330 (25.8) | 891 (28.6) | 556 (33.9) | 35 (53.0) | 130 (33.5) |
| ICS | 3048 (28.8) | 269 (12.4) | 441 (22.8) | 860 (67.2) | 1107 (35.5) | 257 (15.7) | 14 (21.2) | 100 (25.8) |
| Leukotriene modifiers | 4575 (43.2) | 227 (10.5) | 1658 (85.9) | 160 (12.5) | 1515 (48.5) | 806 (49.1) | 38 (57.6) | 171 (44.1) |
| Mast cell stabilizers | 9 (0.1) | 1 (0.1) | 1 (0.1) | 0 (0) | 0 (0) | 0 (0) | 0 (0) | 7 (1.8) |
| LAMA | 255 (2.4) | 10 (0.5) | 13 (0.7) | 7 (0.6) | 21 (0.7) | 18 (1.1) | 4 (6.1) | 182 (46.9) |
| LABA (monotherapy) | 74 (0.7) | 8 (0.4) | 6 (0.3) | 6 (0.5) | 23 (0.7) | 9 (0.6) | 2 (3.0) | 20 (5.2) |
| ICS/LABA combinations | 5473 (51.7) | 344 (15.9) | 380 (19.7) | 510 (39.8) | 2408 (77.2) | 1587 (96.7) | 60 (90.9) | 184 (47.4) |
| Methlxanthines | 143 (1.4) | 1 (0.1) | 31 (1.6) | 6 (0.5) | 36 (1.2) | 37 (2.3) | 5 (7.6) | 27 (7.0) |
| Biologics (anti-IL-5, anti-IgE) | 186 (1.8) | 3 (0.1) | 3 (0.2) | 1 (0.1) | 3 (0.1) | 145 (8.8) | 17 (25.8) | 14 (3.6) |
| OCS | 6602 (62.3) | 1308 (60.5) | 1133 (58.7) | 698 (54.5) | 1935 (62.0) | 1146 (69.8) | 66 (100.0) | 316 (81.4) |
| Antibiotics | 6022 (56.86) | 1205 (55.7) | 1065 (55.2) | 659 (51.5) | 1825 (58.5) | 970 (59.1) | 48 (72.7) | 250 (64.4) |
| **Eosinophil Count** |  |  |  |  |  |  |  |  |
| Patients with an eosinophil measurement (N, %) | 2122 (20.0) | 389 (18.0) | 408 (21.1) | 239 (18.7) | 639 (20.5) | 335 (20.4) | 16 (24.2) | 96 (24.7) |
| With an eosinophil count > 300 cells/µL (N, %) | 976 (46.0) | 185 (47.6) | 151 (37.0) | 94 (39.3) | 319 (49.9) | 174 (51.9) | 12 (75.0) | 41 (42.7) |

**Abbreviations:** ED, emergency department; ICS, inhaled corticosteroid; LABA, long-acting beta agonists; LAMA, long-acting muscarinic antagonist; NHLBI, National Heart, Lung and Blood Institute; SABA, short-acting beta agonist; SD, standard deviation.

**Supplementary table 2** Exacerbationsamong patients with ≥1 exacerbation during the 12-month follow-up period, by type and seasonality

|  | **Overall** | **NHLBI Step** | | | | | | |
| --- | --- | --- | --- | --- | --- | --- | --- | --- |
| **Step 1** | **Step 2** | **Step 3** | **Step 4** | **Step 5** | **Step 6** | **None** |
| **Overall N, (%)** | 10,590 (100.0) | 2163 (20.4) | 1931 (18.2) | 1280 (12.1) | 3121 (29.5) | 1641 (15.5) | 66 (0.6) | 388 (3.7) |
| **Exacerbation type, mean (SD)** |  |  |  |  |  |  |  |  |
| OCS-defined | 0.17 (0.52) | 0.15 (0.47) | 0.14 (0.44) | 0.14 (0.43) | 0.20 (0.55) | 0.29 (0.71) | 0.38 (0.88) | 0.16 (0.53) |
| (N, % with exacerbations)* | 9404 (13.0) | 1780 (11.3) | 1739 (11.0) | 1153 (11.3) | 2833 (14.6) | 1514 (19.1) | 55 (21.8) | 330 (11.5) |
| Asthma-related ED/hospital admission | 0.03 (0.20) | 0.04 (0.25) | 0.02 (0.16) | 0.02 (0.16) | 0.02 (0.19) | 0.03 (0.21) | 0.06 (0.28) | 0.03 (0.19) |
| (N, % with exacerbations)* | 1581 (2.2) | 483 (3.1) | 259 (1.6) | 177 (1.7) | 383 (2.0) | 189 (2.4) | 14 (5.6) | 76 (2.7) |
| **Season (N, % of exacerbations)** **†** |  |  |  |  |  |  |  |  |
| **Winter** | 4441 (30.8) | 894 (30.7) | 758 (30.6) | 529 (32.7) | 1274 (30.0) | 799 (32.1) | 32 (28.6) | 155 (28.0) |
| **Spring** | 3761 (26.1) | 779 (26.7) | 640 (25.8) | 412 (25.5) | 1131 (26.7) | 626 (25.2) | 29 (25.9) | 144 (26.0) |
| **Summer** | 2753 (19.1) | 556 (19.1) | 470 (19.0) | 281 (17.4) | 812 (19.1) | 488 (19.6) | 22 (19.6) | 124 (22.4) |
| **Fall** | 3453 (24.0) | 684 (23.5) | 611 (24.7) | 396 (24.5) | 1026 (24.2) | 576 (23.1) | 29 (26.0) | 131 (23.7) |

**Notes:** *denominator was the overall number of patients (n=72,156); †denominator was the total number of exacerbations (n=14,408).
**Abbreviations:** ED, emergency department; NHLBI, National Heart, Lung, and Blood Institute; OCS, oral corticosteroids; SD, standard deviation.

**Supplementary table 3** Description of treatment changes and medication adherence among all patients during the 12-month follow-up period

|  | **Overall** | **NHLBI Step** | | | | | | |
| --- | --- | --- | --- | --- | --- | --- | --- | --- |
| **Step 1** | **Step 2** | **Step 3** | **Step 4** | **Step 5** | **Step 6** | **None** |
| **N (%)** | 72,156 (100.0) | 15,710 (21.8) | 15,761 (21.8) | 10,221 (14.2) | 19,401 (26.9) | 7941 (11.0) | 252 (0.4) | 2870 (4.0) |
| **Treatment Changes** |  |  |  |  |  |  |  |  |
| **Discontinuation of maintenance therapy, n (%)*** | 26,626 (45.8) | 5505 (74.9) | 5094 (36.0) | 4760 (54.0) | 7637 (43.4) | 2616 (35.4) | 51 (20.8) | 963 (37.5) |
| **Step-up** |  |  |  |  |  |  |  |  |
| Step 1 to 2–4 |  | 4065 (25.9) |  |  |  |  |  |  |
| Steps 2–4 to Steps 5–6 |  |  | 4470 (9.9) | | |  |  |  |
| **SABA Use** |  |  |  |  |  |  |  |  |
| Mean (SD) | 2.28 (3.51) | 3.54 (4.33) | 1.58 (2.90) | 1.84 (3.03) | 2.03 (3.18) | 2.46 (3.58) | 3.52 (4.65) | 1.75 (3.17) |
| 4+ (n, %) | 15,098 (20.9) | 5493 (35.0) | 2066 (13.1) | 1656 (16.2) | 3530 (18.2) | 1846 (23.3) | 78 (31.0) | 429 (15.0) |
| **Adherence** |  |  |  |  |  |  |  |  |
| **PDC (any maintenance medication), mean (SD)** | 0.59 (0.31) | 0.29 (0.28) | 0.69 (0.29) | 0.53 (0.28) | 0.62 (0.29) | 0.68 (0.28) | 0.78 (0.25) | 0.68 (0.30) |
| ≥50% (n, %) | 34,958 (48.4) | 1532 (9.8) | 10,387 (65.9) | 4503 (44.1) | 11,101 (57.2) | 5367 (67.6) | 209 (82.9) | 1859 (64.8) |
| ≥80% (n, %) | 20,712 (28.7) | 671 (4.3) | 7015 (44.5) | 1964 (19.2) | 6,35 (32.9) | 3328 (41.9) | 151 (59.9) | 1208 (42.1) |
| **Inhaled maintenance therapy, mean (SD)** | 0.63 (0.29) | 0.44 (0.30) | 0.71 (0.27) | 0.55 (0.27) | 0.63 (0.28) | 0.69 (0.27) | 0.74 (0.24) | 0.68 (0.30) |
| **Oral maintenance therapy, mean (SD)** | 0.54 (0.31) | 0.42 (0.32) | 0.45 (0.32) | 0.44 (0.33) | 0.48 (0.31) | 0.42 (0.31) | 0.53 (0.29) | 0.62 (0.29) |
| **AMR, mean (SD)** | 0.65 (0.36) | 0.18 (0.28) | 0.79 (0.27) | 0.71 (0.31) | 0.75 (0.27) | 0.77 (0.25) | 0.79 (0.21) | 0.80 (0.27) |
| ≥0.5 (n, %) | 46,450 (64.4) | 2144 (13.6) | 12,665 (80.4) | 7285 (71.3) | 15,255 (78.6) | 6590 (83.0) | 230 (91.3) | 2281 (79.5) |

**Note:** *denominator was the number of patients who used any maintenance therapy in the follow-up.
**Abbreviations:** AMR, asthma medication ratio; NHLBI, National Heart, Lung, and Blood Institute; SABA, short-acting beta agonist; PDC, proportion of days covered; SD, standard deviation.

**Supplementary table 4** Description of treatment changes and medication adherence among patients with ≥1 exacerbation during the 12-month follow-up period

|  | **Overall** | **NHLBI Step** | | | | | | |
| --- | --- | --- | --- | --- | --- | --- | --- | --- |
| **Step 1** | **Step 2** | **Step 3** | **Step 4** | **Step 5** | **Step 6** | **None** |
| **Overall N, (%)** | 10,590 (100.0) | 2163 (20.4) | 1931 (18.2) | 1280 (12.1) | 3121 (29.5) | 1641 (15.5) | 66 (0.6) | 388 (3.7) |
| **Treatment Changes** |  |  |  |  |  |  |  |  |
| **Discontinuation of maintenance therapy, n (%)*** | 5102 (48.5) | 1649 (78.0) | 734 (38.1) | 734 (57.6) | 1272 (40.8) | 549 (33.5) | 14 (21.2) | 150 (38.9) |
| **Step-up** |  |  |  |  |  |  |  |  |
| Step 1 to 2–4 |  | 1044 (48.3) |  |  |  |  |  |  |
| Steps 2–4 to Steps 5–6 |  |  | 1141 (18.0) | | |  |  |  |
| **SABA Use** |  |  |  |  |  |  |  |  |
| Mean (SD) | 3.63 (4.37) | 5.18 (5.12) | 2.90 (3.94) | 3.10 (3.86) | 3.20 (3.99) | 3.58 (4.24) | 4.80 (5.25) | 3.69 (4.55) |
| 4+ (n, %) | 3633 (34.3) | 1091 (50.4) | 503 (26.0) | 367 (28.7) | 939 (30.1) | 570 (34.7) | 32 (48.5) | 131 (33.8) |
| **Adherence** |  |  |  |  |  |  |  |  |
| **PDC (any maintenance therapy), mean (SD)** | 0.56 (0.32) | 0.26 (0.26) | 0.66 (0.30) | 0.50 (0.28) | 0.63 (0.29) | 0.69 (0.28) | 0.75 (0.25) | 0.65 (0.30) |
| ≥50% (n, %) | 5897 (55.7) | 364 (16.8) | 1346 (69.7) | 621 (48.5) | 2039 (65.3) | 1218 (74.2) | 54 (81.8) | 255 (65.7) |
| ≥80% (n, %) | 3394 (32.0) | 134 (6.2) | 903 (46.8) | 258 (20.2) | 1153 (36.9) | 745 (45.4) | 37 (56.1) | 164 (42.3) |
| **Inhaled maintenance therapy, mean (SD)** | 0.64 (0.29) | 0.45 (0.30) | 0.71 (0.27) | 0.55 (0.27) | 0.67 (0.27) | 0.72 (0.26) | 0.73 (0.24) | 0.69 (0.29) |
| **Oral maintenance therapy, mean (SD)** | 0.45 (0.32) | 0.43 (0.32) | 0.46 (0.33) | 0.42 (0.33) | 0.46 (0.34) | 0.40 (0.31) | 0.47 (0.27) | 0.47 (0.31) |
| **AMR, mean (SD)** | 0.60 (0.33) | 0.24 (0.28) | 0.70 (0.27) | 0.62 (0.30) | 0.69 (0.27) | 0.73 (0.24) | 0.74 (0.22) | 0.70 (0.26) |
| ≥0.5 (n, %) | 7079 (66.8) | 468 (21.6) | 1555 (80.5) | 879 (68.7) | 2448 (78.4) | 1361 (82.9) | 59 (89.4) | 309 (79.6) |

**Note:** *denominator was the number of patients who used any maintenance therapy in the follow-up.
**Abbreviations:** AMR, asthma medication ratio; NHLBI, National Heart, Lung, and Blood Institute; SABA, short-acting beta agonist; PDC, proportion of days covered; SD, standard deviation.
